# Supplementary material
Source: PubMed Central journal article supplement (PMC6916126)
Supplement: Supp_Table2.pdf [file Supp_Table2.pdf]

SUPPLEMENTARY TABLE S2. PROPORTION OF MALIGNANCIES CLASSIFIED AS LOW RISK, INTERMEDIATE RISK, OR HIGH RISK BY SONOGRAPHIC PATTERN (N [%]; TABLE OF FIG. 2C)

|                                   | <i>Low-risk cancer,</i><br>n=76 (61) | <i>Intermediate-risk cancer,</i><br>n=38 (31) | <i>High-risk cancer,</i><br>n=10 (8) | <i>p-Value</i> |
|-----------------------------------|--------------------------------------|-----------------------------------------------|--------------------------------------|----------------|
| Low/intermediate suspicion (n=45) | 32 (71)                              | 12 (27)                                       | 1 (2)                                | 0.13           |
| Non-ATA suspicion (n=59)          | 33 (56)                              | 21 (36)                                       | 5 (8)                                |                |
| High suspicion (n=20)             | 11 (55)                              | 5 (25)                                        | 4 (20)                               |                |

Two intrathyroidal parathyroid carcinomas are excluded. See Methods section for definition of groups. Low and intermediate suspicion sonographic patterns were grouped for the analysis (Fisher's exact test).
